# Supplementary material
Source: Springer Nature journal article supplement (https://www.springermedizin.de/resource/supplementary/12876_2014_1143_MOESM3_ESM.pdf/9438180)

**Class 1**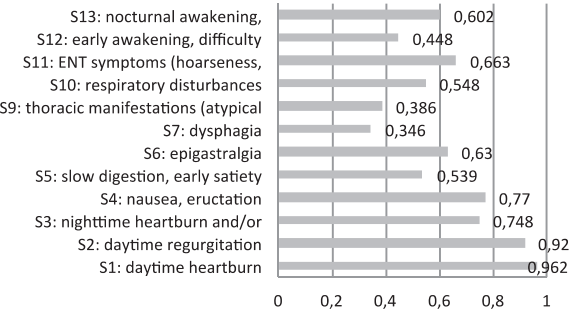**Class 2**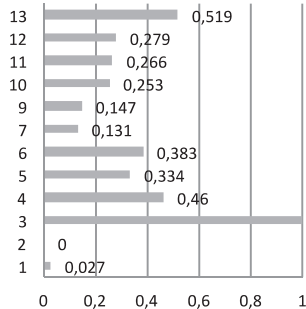**Class 3**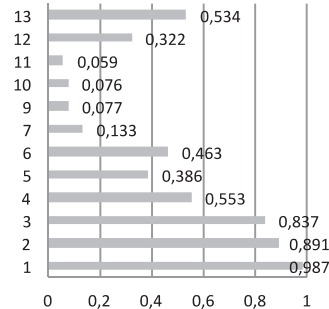**Class 4**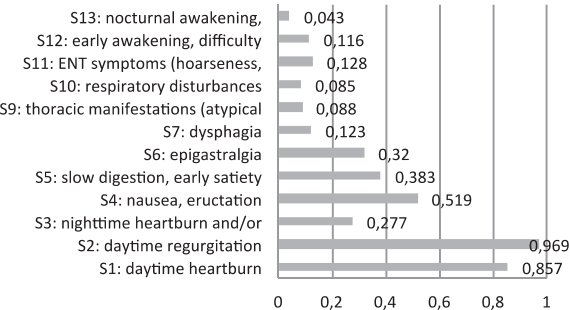**Class 5**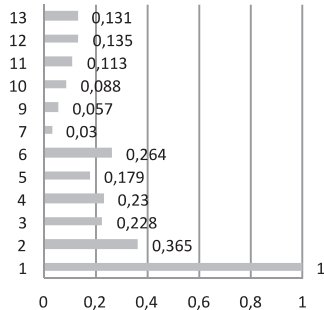

Supplement: MOESM3 [file 9438180]
